# Supplementary material for: The transcriptional response of pathogenic Leptospira to peroxide reveals new defenses against infection-related oxidative stress
Source: PLoS Pathog. 2020 Oct 6;16(10):e1008904. doi: 10.1371/journal.ppat.1008904 (PMC7567364; doi:10.1371/journal.ppat.1008904)
Supplement: S7 Table — (DOCX) [file ppat.1008904.s015.docx]

| **Mutant name** | **ORF** | **Annotation** | **Position in genomea** | **Tn insertion siteb** |
| --- | --- | --- | --- | --- |
| Man 69c | LIMLP_10145 | Catalase (*katE*) | 2425442-2426887 | 2425862 |
| M776d | LIMLP_10155 | PerR | 2427923-2428360 | 2427985 |
| Man 782c | LIMLP_04245 | Biopolymer transport ExbD/TolR | 1029081-1029491 | 1029153 |
| Man 899c | LIMLP_16720 | Two component sytem response regulator (*vicR*) | 3977080-3977781 | 3977570 |
| Man 1022c | LIMLP_04270 | TonB-dependent receptor | 1032369-1035344 | 1033465 |
| Man 1089c | LIMLP_04280 | Outer membrane lipoprotein LipL48 | 1036143-1037525 | 1037032 |
| Man 1368c | LIMLP_05955 | Peroxiredoxin (*ahpC*) | 1458932-1459513 | 1459214 |
| Man 1448c | LIMLP_16725 | Two component system histidine kinase (*vicK*) | 3977771-3979162 | 3978896 |

a position according to *Leptospira interrogans* serovar Manilae UP-MMC-NIID-LP genome (Satou et al., 2015).

b nucleotide of the insertion site according to *Leptospira interrogans* serovar Manilae UP-MMC-NIID-LP genome (Satou et al., 2015).

c Mutants obtained by random insertion of a transposon (our laboratory).

d Mutant obtained by random insertion of a transposon (Lo et al., 2010).

**S7 Table: Transposon mutants used in this study**.
